# Supplementary material for: Sirt6 is required for spermatogenesis in mice
Source: publisher site journal article supplement (doi:10.18632/aging.103641), 2020-09-11
Supplement: Supplementary file [file aging-v12i17-103641-supplementary-material-SD1.pdf]

## SUPPLEMENTARY FIGURE

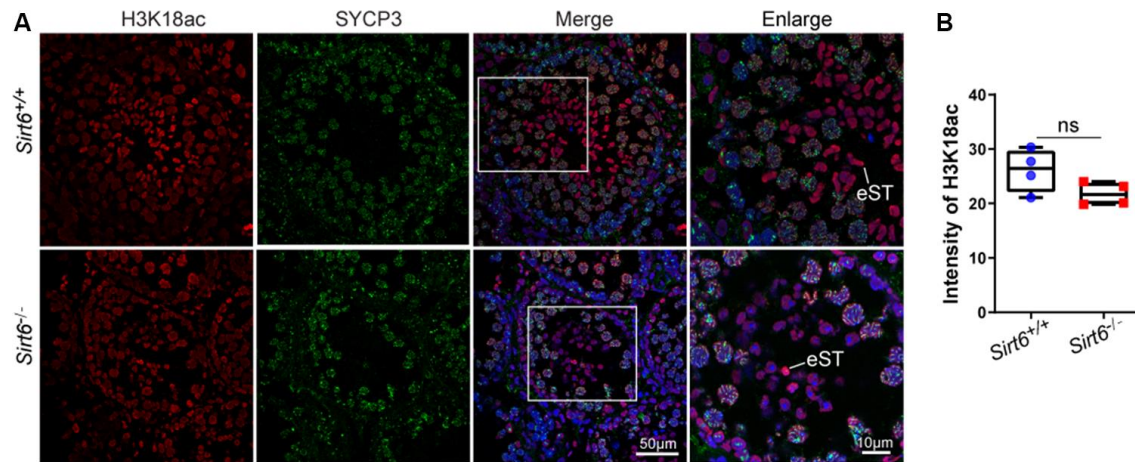

**Supplementary Figure 1. The role of Sirt6 in spermatogenesis is independent of H3K18ac.** (A) Localization of H3K18ac in *Sirt6*<sup>+/+</sup> and *Sirt6*<sup>-/-</sup> seminiferous tubules. Testes sections of *Sirt6*<sup>+/+</sup> and *Sirt6*<sup>-/-</sup> stained with SYCP3 (green) and H3K18ac (red) antibodies. 8-week mice, n=4. (B) Quantification of H3K18ac intensity of elongated spermatids in the *Sirt6*<sup>+/+</sup> and *Sirt6*<sup>-/-</sup> mice. *Sirt6*<sup>+/+</sup>, 26.09±3.95; *Sirt6*<sup>-/-</sup>, 21.79±2.12. 8-week mice, n=4; 200 cells were used for each group. Data are presented as mean ± SEM.
